# Supplementary material for: Efficacy and Safety of Ganduqing Granules in Treating the Common Cold: A Multicenter, Randomized, Double-Blind, Placebo-Controlled Trial
Source: Evid Based Complement Alternat Med. 2022 Jun 9;2022:5105503. doi: 10.1155/2022/5105503 (PMC9203204; doi:10.1155/2022/5105503)
Supplement: Supplementary Materials — Supplemental File 1: the study program details. Supplemental File 2: specific scoring rules of TCM. [file 5105503.f1.zip]

Archive with 2 entries (2 files):
- 5105503.f1/Supplementary File 1. The study program details.docx
- 5105503.f1/Supplementary File 2.  Specific Scoring Rules of TCM..docx
